# Supplementary material for: A direct ammonium carbonate fuel cell with an anion exchange membrane
Source: Royal Society of Chemistry journal article supplement (doi:10.1039/c3ra44057e), 2013-11-05
Supplement: c3ra44057e.pdf [file c3ra44057e.pdf]

## Supplementary

Table A1. The basic properties of the anion exchange membrane (AHA, Astom. Japan).

| Type                | Strongly basic anion permeable                     |
|---------------------|----------------------------------------------------|
| Characteristics     | High mechanical strength, base resistant (Cl-form) |
| Electric resistance | $4.1 \Omega\text{-cm}^2$ , 25 °C                   |
| Burst strength      | $\geq 0.90 \text{ MPa}$                            |
| Thickness           | 0.22 mm                                            |

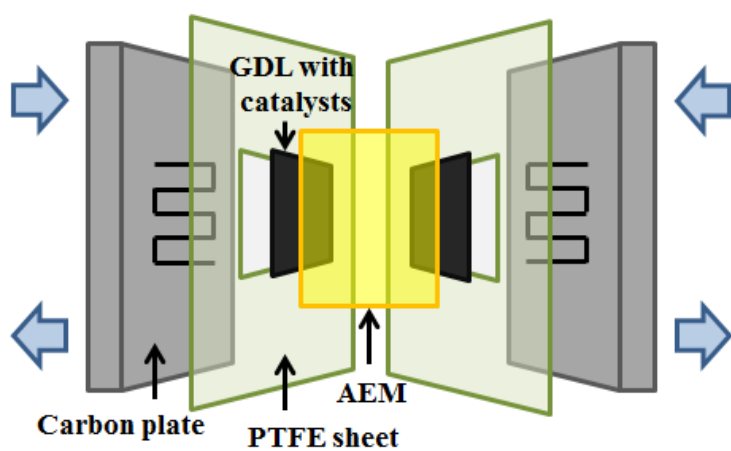

Fig. A1 Schematic diagram of the single cell

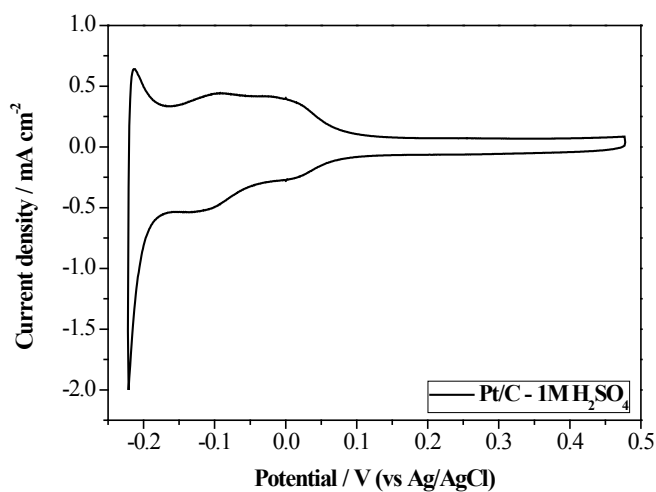

Fig. A2 Cyclic voltammogram of Pt/C in 1M H<sub>2</sub>SO<sub>4</sub> solution at scan rate 15 mV sec<sup>-1</sup>.

Calculation of electrochemical active surface area (EAS)

Proton adsorption/desorption area of Pt/C was achieved from potential range between -0.22 V ~ 0.1 V

(vs Ag/AgCl). To remove effect of capacitance, area corresponding to current density at 0.1 V was removed.  
EAS of Pt/C is  $17.2 \text{ m}^2 \text{ g}_{\text{catal.}}^{-1}$ .

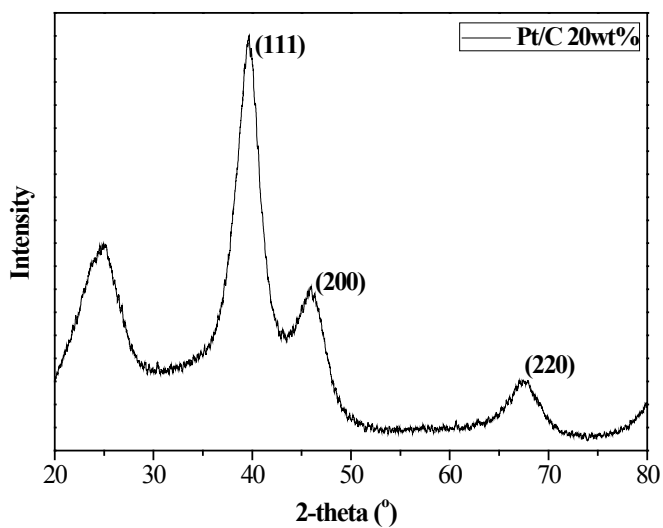

Fig. A3 XRD result of Pt/C

XRD pattern of Pt/C was characterized using  $\text{CuK}\alpha$  radiation (XRD, D/MAX-IIIC diffractometer, Rigaku Co.).
